# Supplementary material
Source: publisher site journal article supplement (https://www.dovepress.com/article/327339)
Supplement: Supplementary file 1 [file get_supplementary_file.php]

| **Etiology** | **Number** | **P62 expression** | | **Glypican 3 expression*** | |
| --- | --- | --- | --- | --- | --- |
| **Tumor** | **Non-tumor** | **Tumor** | **Non-tumor** |
| **ETOH** | 10 | 10/10 (100%) | 5/10  (50%) | 8/9  (88.8%) | 0/9  (0%) |
| **HBV** | 14 | 12/14 (85.7%) | 6/14  (42.8%) | 9/13 (69.2%) | 0/13  (0%) |
| **HCV** | 18 | 14/18 (77.7%) | 8/18  (44.4%) | 17/19 (89.4%) | 0/19  (0%) |
| **NAFLD** | 16 | 16/16 (100%) | 10/16 (62.5%) | 10/14 (71.4%) | 1/14  (7.1%) |
| **Total** | 58 | 52/58 (89.6%) | 29/58  (50%) | 44/55  (80%) | 1/55  (1.8%) |

**Supplementary Table 1. Summary of p62 and glypican 3 expression in HCC and adjacent cirrhotic tissues**

*ETOH: Ethanol, HBV: Hepatitis B Virus, HCV: Hepatitis C Virus, NAFLD: Non-Alcoholic Fatty Liver Disease*

** Immunostaining of glypican 3 was not performed in three patients due to the lack of enough tissue.*

**Supplementary Table 2. Demographical data of patients with cirrhosis, HCC, and non-liver cancer**

|  | Cirrhosis  (n=25) | HCC  (n=25) | Non-liver cancer  (n=10) |
| --- | --- | --- | --- |
| Age (years) (mean±SD) | 61±4.8 | 66.5±8 | 59.4±12.3 |
| Gender (n/%) |  |  |  |
| Female | 10/40 | 7/28 | 5/50 |
| Male | 15/60 | 18/72 | 5/50 |
| Race (n/%) |  |  |  |
| White | 11/44 | 4/16 | 4/40 |
| African American | 5/20 | 8/32 | 5/50 |
| Caucasian | 8/32 | 9/36 | 0/0 |
| Other | 1/4 | 4/16 | 1/10 |
| Cirrhosis Etiology (n/%) |  |  |  |
| HCV | 19/76 | 16/64 | N/A |
| ETOH | 3/12 | 1/4 | N/A |
| Other | 3/12 | 8/32 | N/A |
| Serum AFP (median, ng/ml)  [IQR] | 3.6  [2.3-8.3] | 81  [12-1089] | N/A |
| Tumor Type (n/%) |  |  |  |
| HCC | 0/0 | 25/100 | 0/0 |
| Prostate | 0/0 | 0/0 | 3/30 |
| Breast | 0/0 | 0/0 | 4/40 |
| Pancreas | 0/0 | 0/0 | 3/30 |

*HCC: Hepatocellular carcinoma AFP: Alpha feto protein, IQR: Interquartile range 25th-75th percentile,*

*ETOH: Ethanol, HBV: Hepatitis B Virus, HCV: Hepatitis C Virus, N/A: Non-applicable*

**Supplementary Table 3. Demographic data of patients with HCC undergoing DEB-TACE**

|  | Total (n=43) |
| --- | --- |
| Age (years) (mean±SD) | 60.1±6.1 |
| Gender (n/%) |  |
| Female | 18/41.9 |
| Male | 25/58.1 |
| Race (n/%) |  |
| Caucasian | 34/79.1 |
| African American | 3/7 |
| Other | 6/14 |
| Cirrhosis Etiology (n/%) |  |
| HCV | 23/53.5 |
| HCV+ETOH | 6/18.6 |
| NAFLD | 8/18.6 |
| ETOH | 4/9.3 |
| HBV | 1/2.3 |
| AIH | 1/2.3 |
| MELDNa score median [IQR] | 11 [9-16] |
| Number of lesion median (min-max) | 1(1-3) |
| Largest lesion diameter (cm) (mean±SD) | 2.8±0.7 |
| Cumulative burden size (cm) (mean±SD) | 3±0.9 |
| Pre-treatment AFP (ng/ml) median, [IQR] | 10 [5.4-31] |
| Post-treatment AFP (ng/ml) median, [IQR] | 11 [4.5-36] |
| Objective Response |  |
| Present (n/%) | 24/55.8 |
| Absent (n/%) | 19/44.2 |

*AFP: Alpha feto protein, IQR: Interquartile range 25th-75th percentile, AIH: Autoimmune hepatitis, ETOH: Ethanol, HBV: Hepatitis B Virus, HCV: Hepatitis C Virus, NAFLD: Non-Alcoholic Fatty Liver Disease*

**
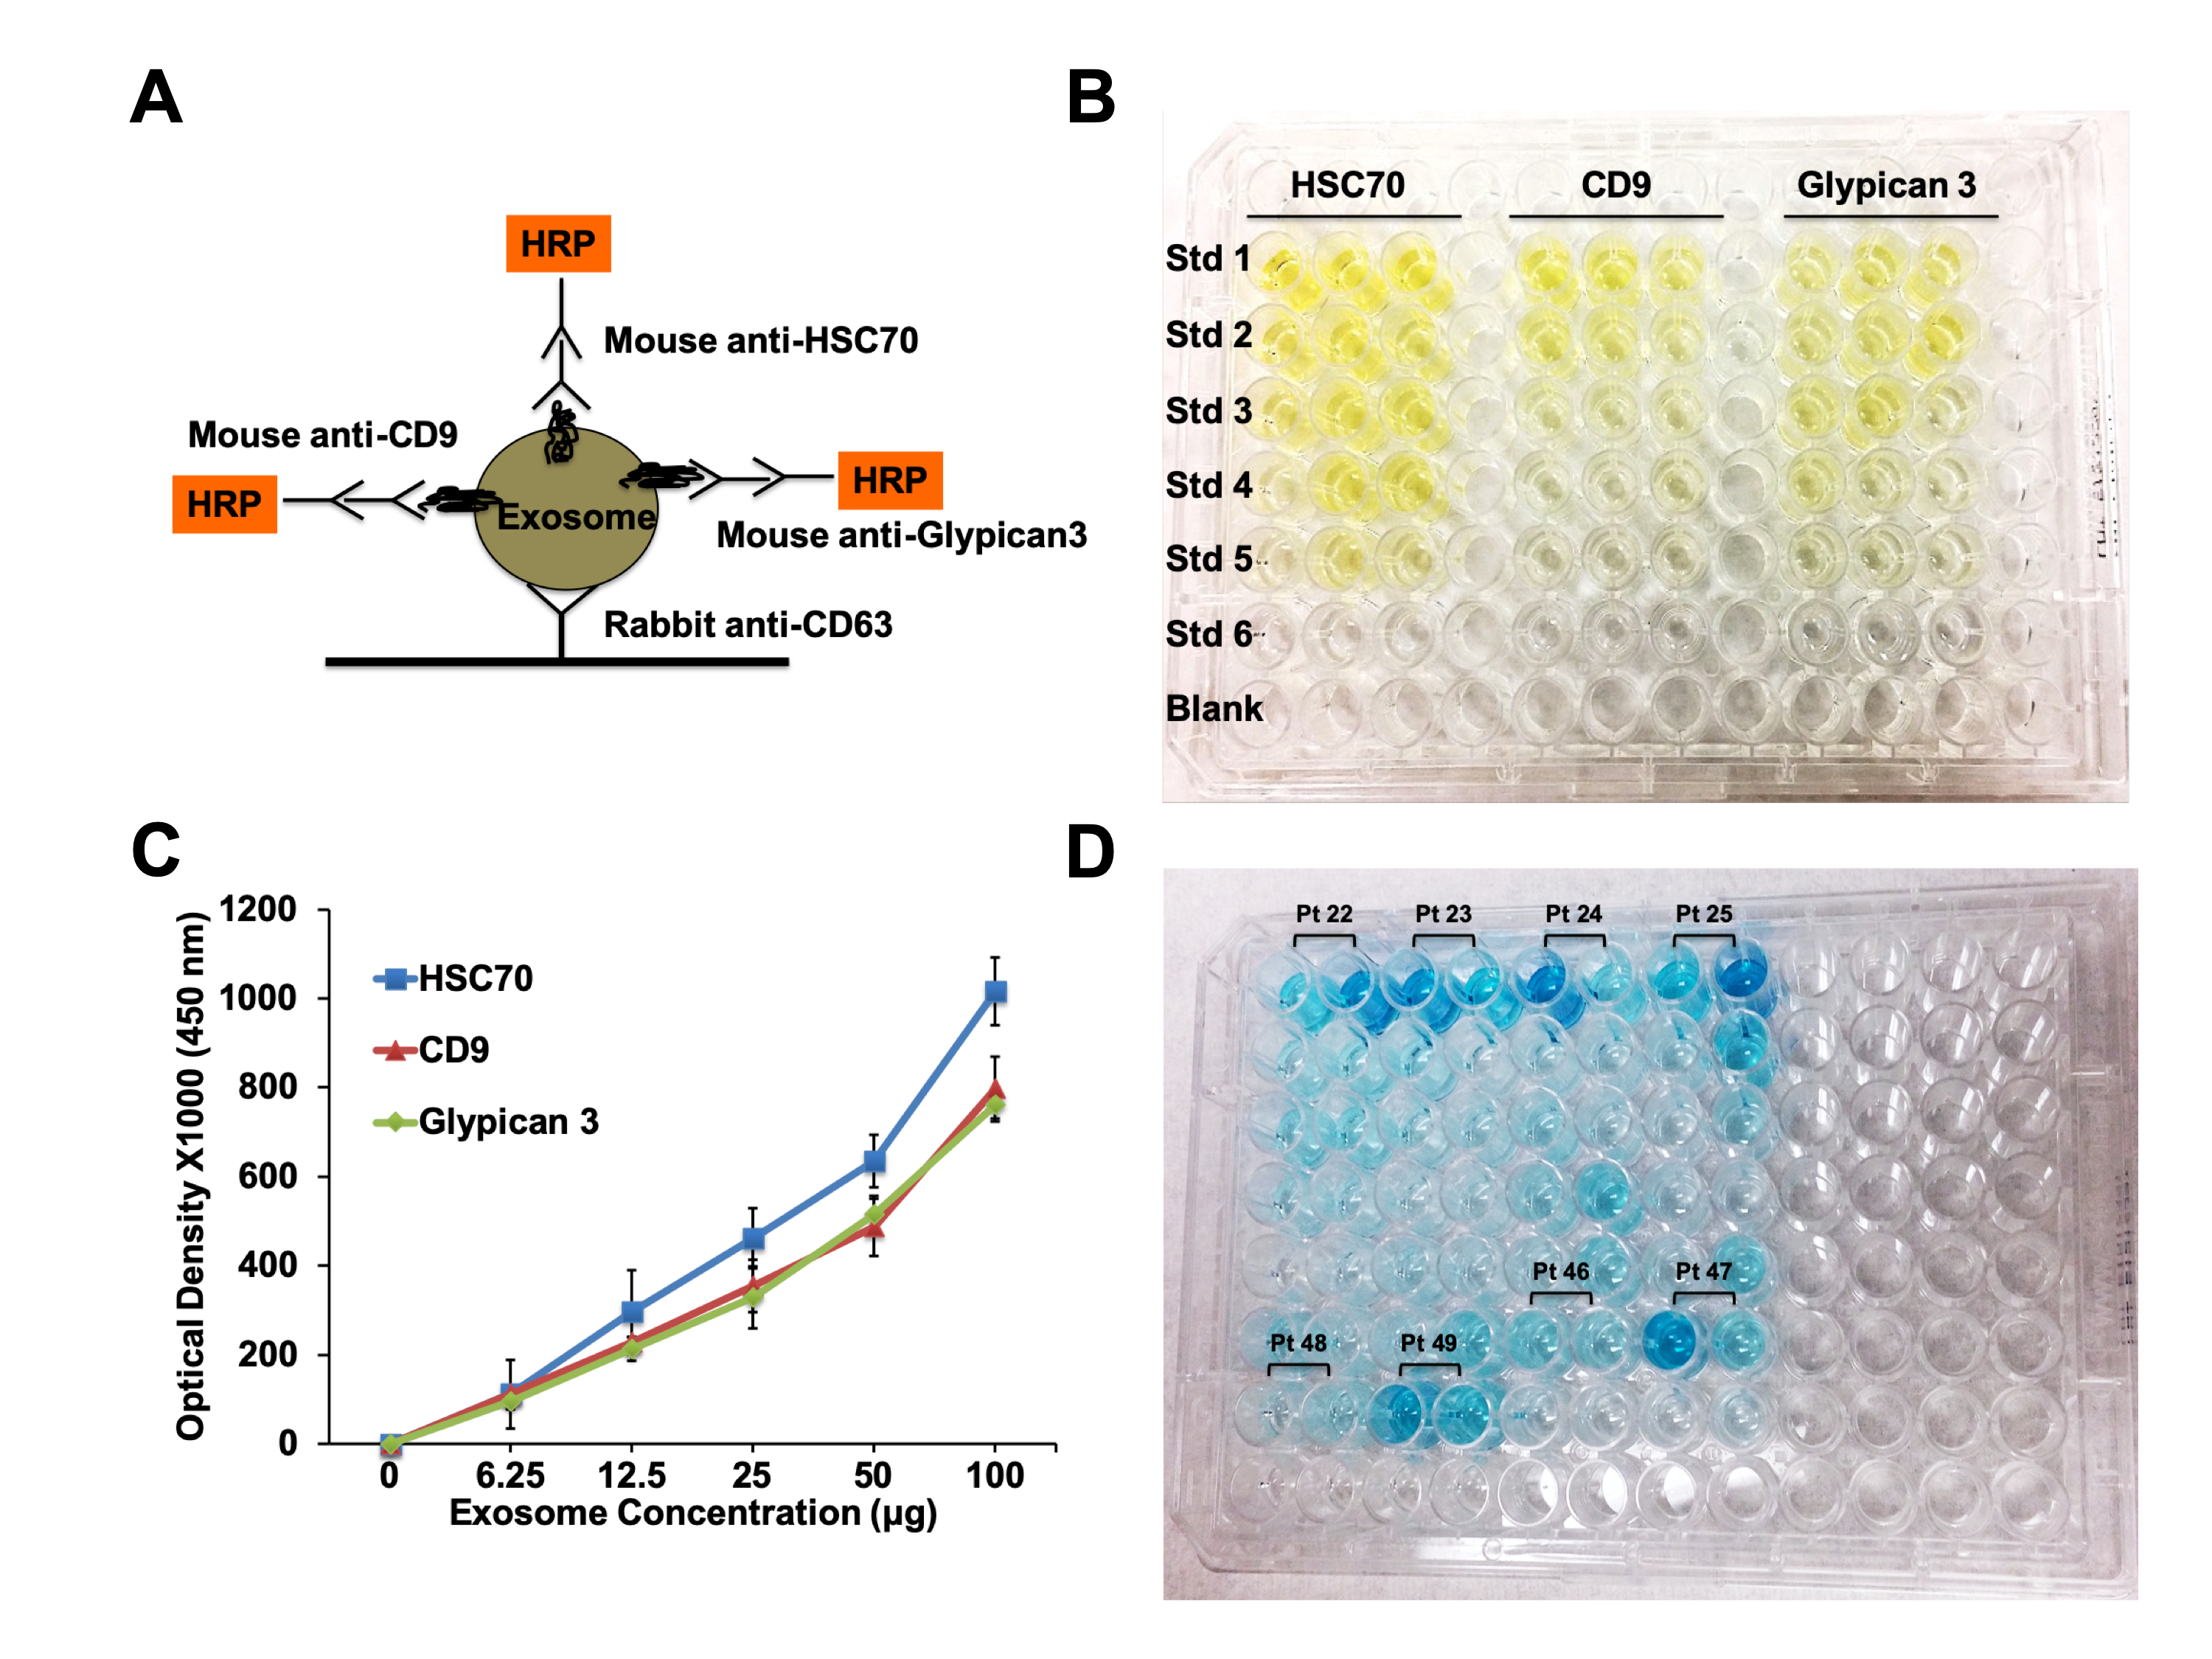
**

**Supplementary Figure 1:** Exosome capture by affinity ELISA for multiplex surface analysis of exosome-associated molecules. **A.** Schematic illustration of the affinity ELISA capture and analytic approach. **B**. A representative affinity ELISA plate of multiplex analysis of HSC70, glypican 3, and CD9 in exosomes bound from the microplate. **C.** Shows concentration-dependent detection of HSC70, CD9, and glypican 3 on exosome surface.**D.**A representative picture of affinity ELISA for CD9 and glypican 3 detection on HCC exosomes isolated from the serum of HCC patients before and after chemotherapy.
